# Supplementary material for: Efficient hierarchically synthesized Fe2P nanoparticles embedded in an N,P-doped mesoporous carbon catalyst for the oxygen reduction reaction
Source: Royal Society of Chemistry journal article supplement (doi:10.1039/c8nj00380g), 2018-01-01
Supplement: c8nj00380g1.pdf [file c8nj00380g1.pdf]

## **Supporting information**

### **An efficient hierarchically synthesized Fe<sub>2</sub>P nanoparticles embedded in N, P-doped mesoporous carbon catalyst for oxygen reduction reaction**

Guang-Lan Li,\* Li-Fang Yuan, Wen-Wen Chen, Bei-Bei Yang, Cai-Di Liu, Guang-  
Chun Cheng, Xiao-Cun Xu, and Ce Hao

*State Key Laboratory of Fine Chemicals, Dalian University of Technology, Panjin,  
124221, Liaoning, China*

\*Corresponding Author: Guang-Lan Li, Email: [guanglanli@dlut.edu.cn](mailto:guanglanli@dlut.edu.cn)

Tel: +8613514278895

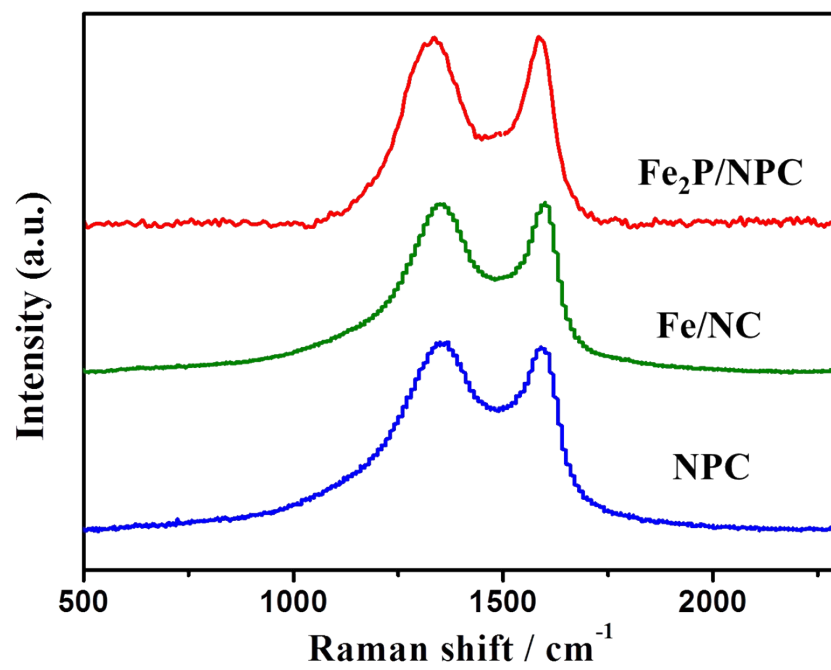

**Fig. S1** Raman spectra of Fe/NC, NPC and Fe<sub>2</sub>P/NPC catalysts.

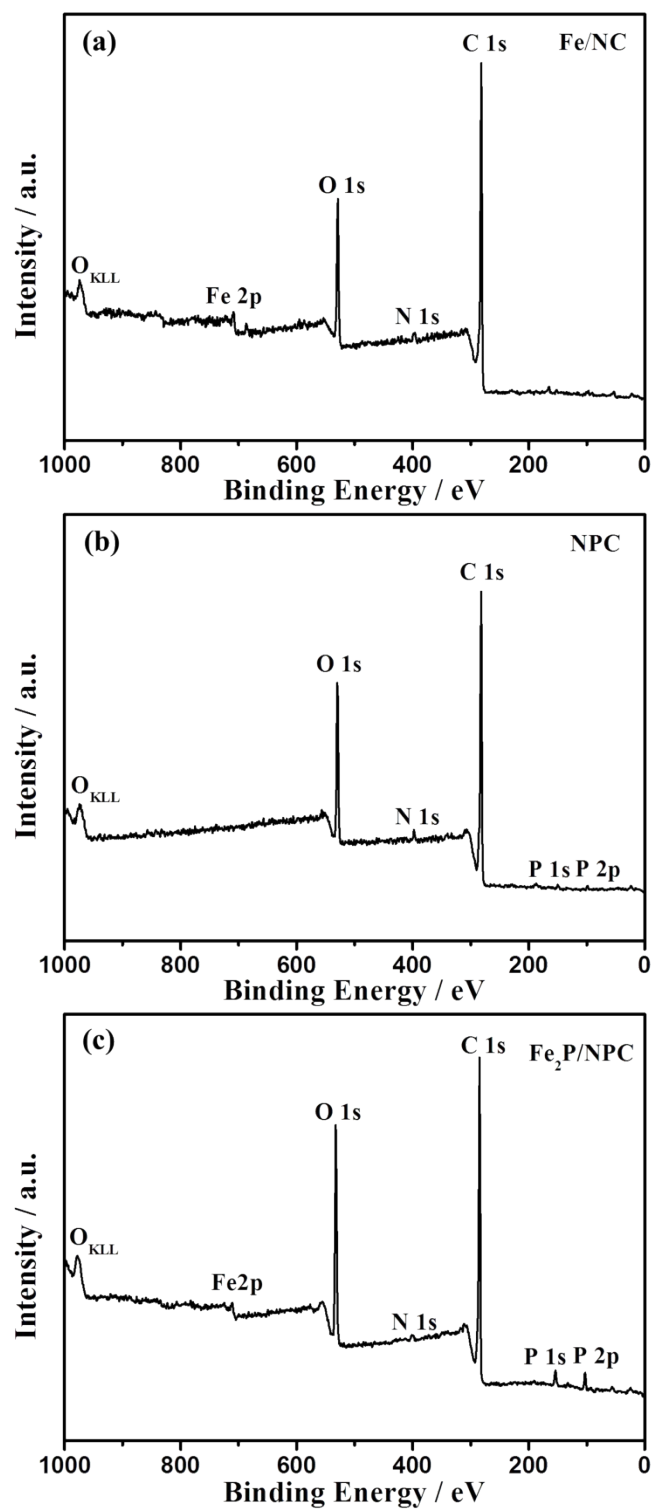

**Fig. S2** XPS survey spectra for (a) Fe/NC, (b) NPC and (c) Fe<sub>2</sub>P/NPC catalysts.

**Table S1.** The total contents of N, Fe, P, O, C and the relative amounts of different types of N species for Fe/NC, NPC, Fe<sub>2</sub>P/NPC and the corresponding catalytic parameters for ORR.

| <b>Samples</b>                                       | <b>Fe<sub>2</sub>P/NPC</b> | <b>Fe/NC</b> | <b>NPC</b>   |
|------------------------------------------------------|----------------------------|--------------|--------------|
| <b>N (at. %)</b>                                     | <b>1.5</b>                 | <b>2.59</b>  | <b>1.28</b>  |
| N <sub>1</sub> : Pydinic N                           | 24.3                       | 4.57         | 16.46        |
| N <sub>2</sub> : Graphitic N                         | 47.8                       | 39.86        | 34.5         |
| N <sub>3</sub> : Pyrrolic N                          | 23.1                       | 26.7         | 25.1         |
| N <sub>4</sub> : Oxidized N                          | 4.8                        | 28.9         | 23.9         |
| <b>Fe (at. %)</b>                                    | <b>0.78</b>                | <b>1.2</b>   | <b>/</b>     |
| <b>P (at. %)</b>                                     | <b>1.0</b>                 | <b>/</b>     | <b>1.62</b>  |
| <b>O (at. %)</b>                                     | <b>21.2</b>                | <b>15.43</b> | <b>18.56</b> |
| <b>C (at. %)</b>                                     | <b>75.5</b>                | <b>80.78</b> | <b>78.55</b> |
| <b><i>E</i><sub>onset</sub> (V)</b>                  | <b>0.02</b>                | <b>-0.01</b> | <b>-0.09</b> |
| <b><i>J</i><sub>limit</sub> (mA cm<sup>-2</sup>)</b> | <b>6.1</b>                 | <b>5.6</b>   | <b>4.1</b>   |

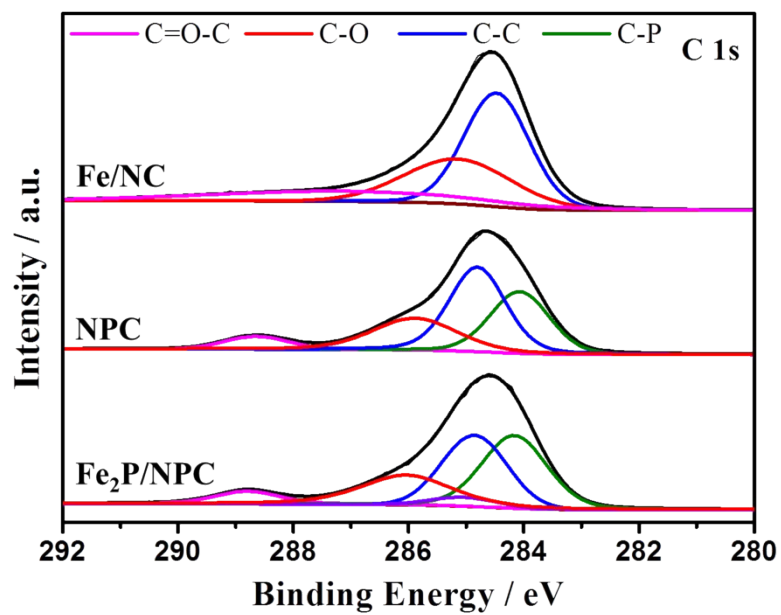

**Fig. S3** High-resolution C 1s spectra of Fe/NC, NPC, and Fe<sub>2</sub>P/NPC catalysts.

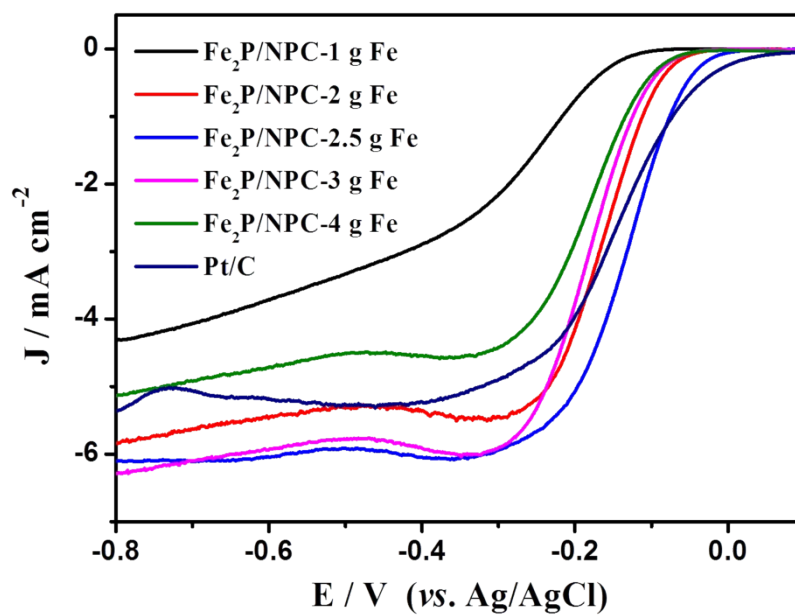

**Fig. S4** CV curves of  $\text{Fe}_2\text{P/NPC}$  with different Fe precursor feeding content in  $\text{O}_2$ -saturated 0.1 M KOH solution with a rotation speed of 1600 rpm at room temperature, scan rate:  $10 \text{ mV s}^{-1}$ .

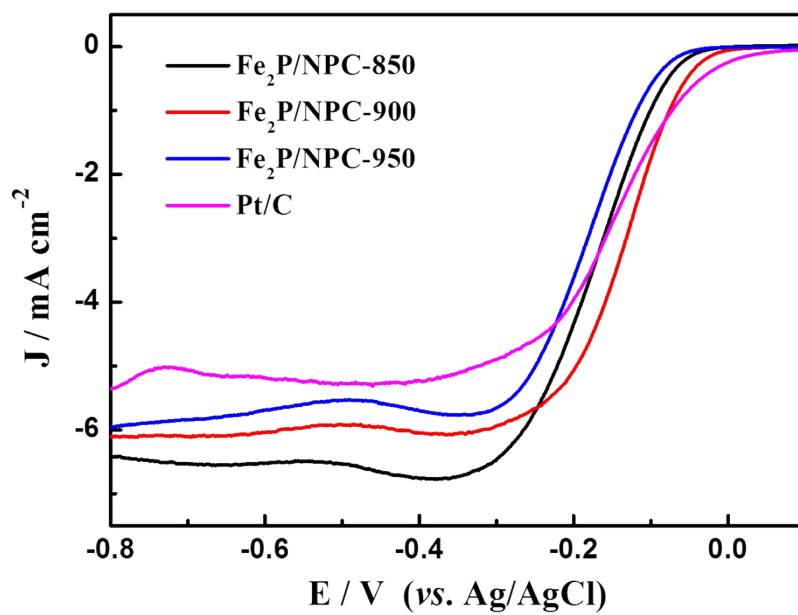

**Fig. S5** CV curves of  $\text{Fe}_2\text{P/NPC-T}$  ( $T=850, 900, 950$  °C) in  $\text{O}_2$ -saturated 0.1 M KOH solution with a rotation speeds of 1600 rpm at room temperature, scan rate:  $10 \text{ mV s}^{-1}$ .

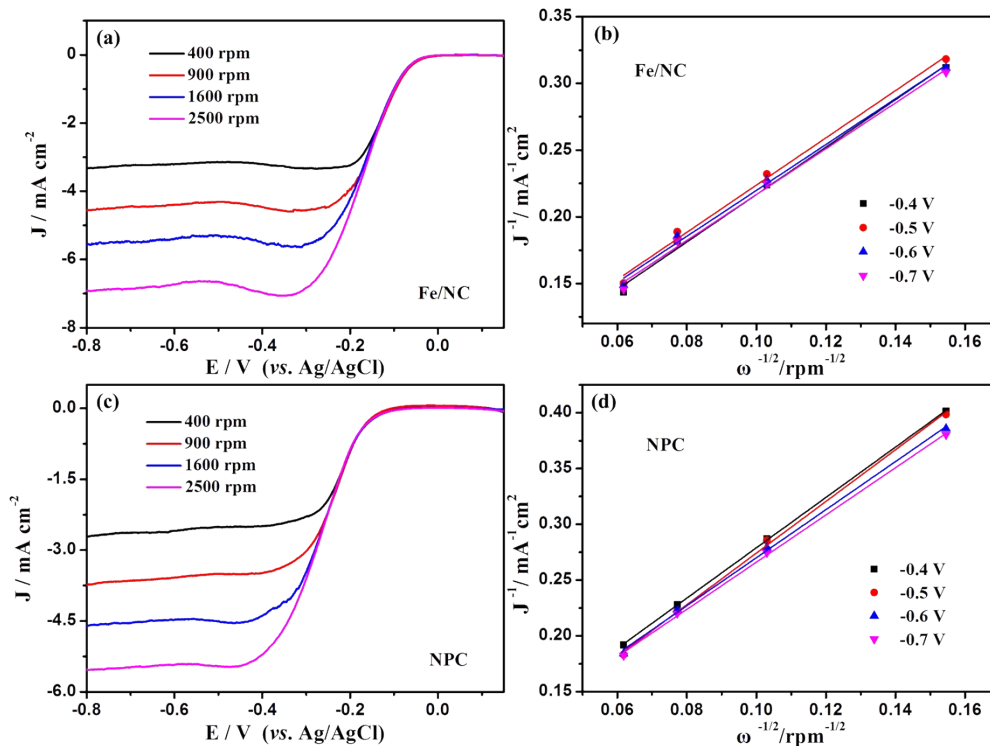

**Fig. S6** LSV curves of Fe/NC (a) and NPC (c) catalysts in O<sub>2</sub>-saturated 0.1 M KOH solution at different rotation speeds from 400 to 2500 rpm at room temperature, scan rate: 10 mV s<sup>-1</sup>. Corresponding Koutecky-Levich plots of Fe/NC (b) and NPC (d) catalysts at different potentials varied from -0.4 to -0.7 V.



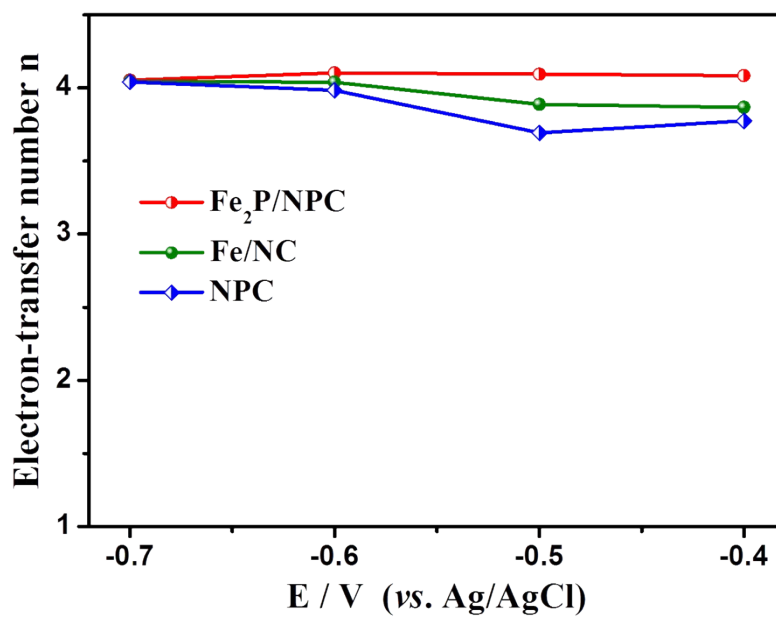

**Fig. S7** The dependence of electron transfer number  $n$  on potential for Fe/NC, NPC, and Fe<sub>2</sub>P/NPC catalysts.

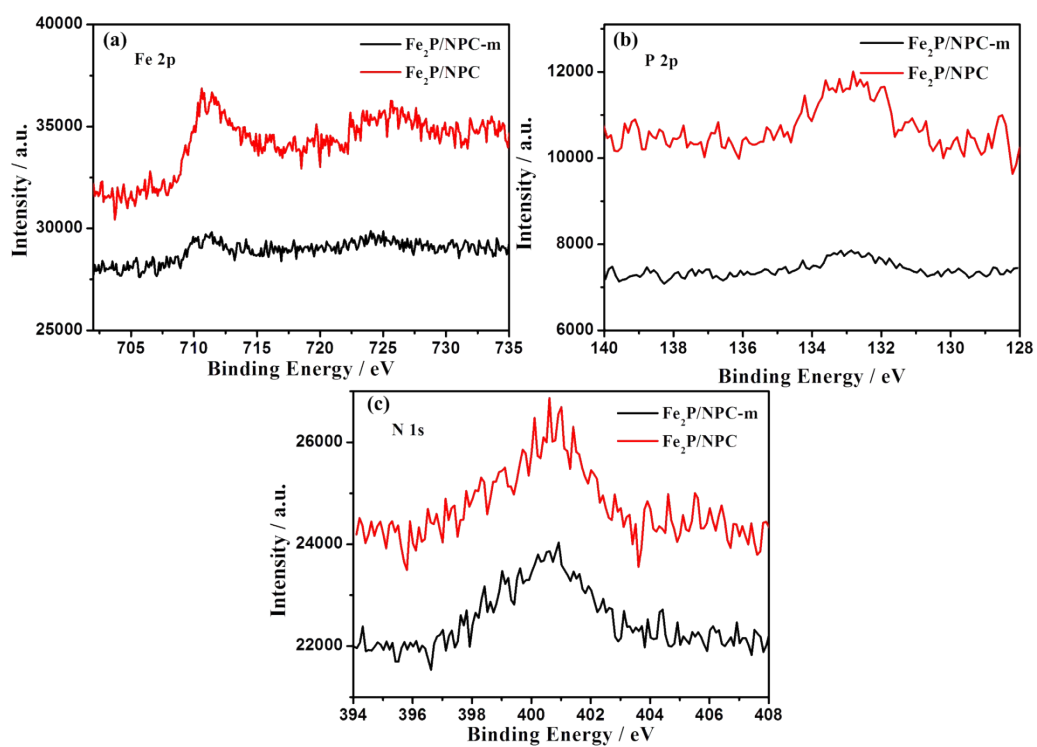

**Fig. S8** High-resolution (a) Fe 2p spectra, (b) P 2p spectra, and (c) N 1s spectra of Fe<sub>2</sub>P/NPC-m and Fe<sub>2</sub>P/NPC catalysts.

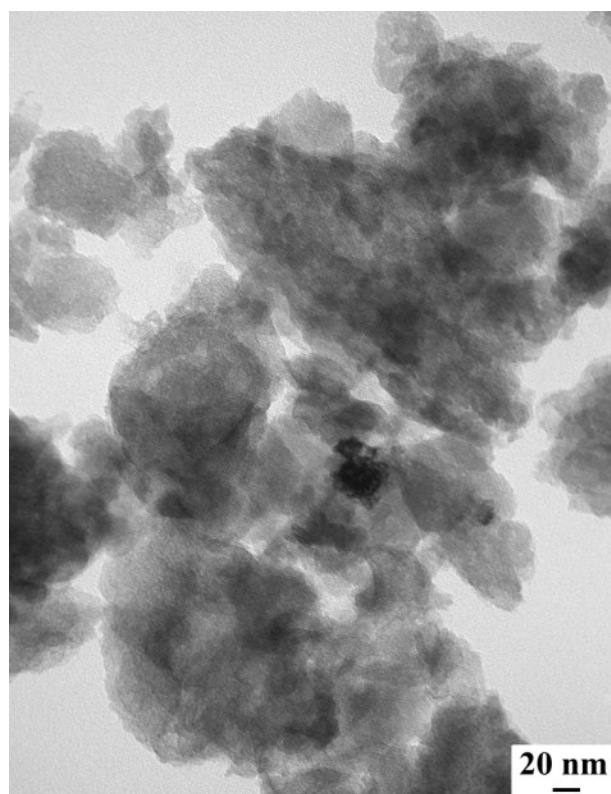

**Fig. S9** The TEM image of Fe<sub>2</sub>P/NPC-m catalyst.

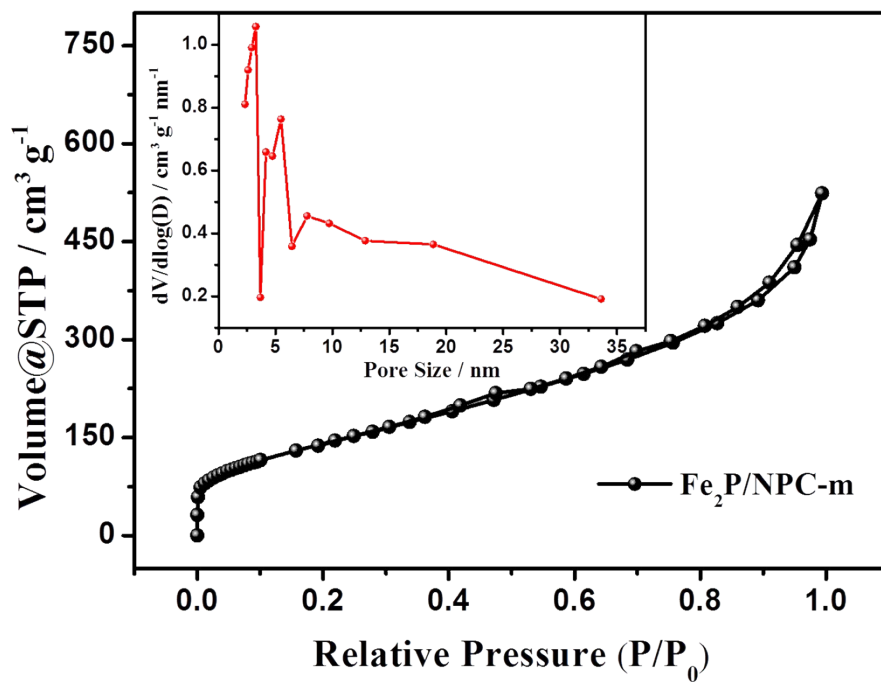

**Fig. S10**  $\text{N}_2$  adsorption-desorption isotherm and pore size distribution curve of  $\text{Fe}_2\text{P}/\text{NPC-m}$  catalyst.

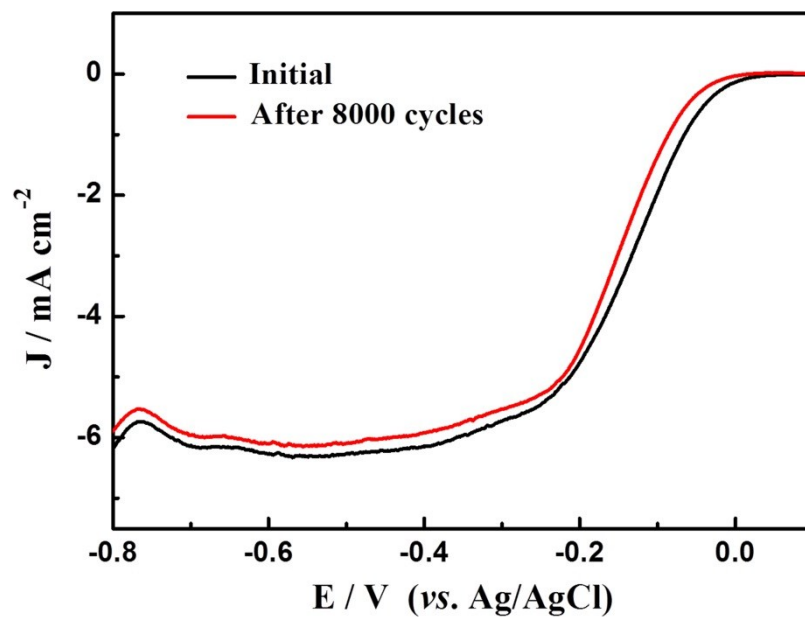

**Fig. S11** CV curves of commercial 20 wt. % Pt/C for ORR in O<sub>2</sub>-saturated 0.1 M KOH solution before and after continuous 8000 cycles between -0.4-0.1 V at a rotation rate of 1600 rpm at room temperature, scan rate: 10 mV s<sup>-1</sup>.
